# Supplementary material for: Poly(A)-specific ribonuclease regulates the processing of small-subunit rRNAs in human cells
Source: PubMed Central journal article supplement — Nucleic Acids Res. 2016 Nov 24;45(6):3437–47. doi: 10.1093/nar/gkw1047 (PMC5389690; doi:10.1093/nar/gkw1047), 2016-11-24

## Supplementary Materials

### Poly(A)-specific ribonuclease regulates processing of small subunit rRNA in human cells

Hideaki Ishikawa<sup>1, 2</sup>, Harunori Yoshikawa<sup>2, 3</sup>, Keiichi Izumikawa<sup>1, 2</sup>, Yutaka Miura<sup>1, 2</sup>, Masato Taoka<sup>4</sup>, Yuko Nobe<sup>4</sup>, Yoshio Yamauchi<sup>4</sup>, Hiroshi Nakayama<sup>5</sup>, Richard J Simpson<sup>2,6</sup>, Toshiaki Isobe<sup>2,4</sup>, and Nobuhiro Takahashi<sup>1,2</sup>

<sup>1</sup> Graduate School of Agriculture, Tokyo University of Agriculture and Technology, 3-5-8 Saiwai-cho, Fuchu-shi, Tokyo 183-8509, Japan

<sup>2</sup> Global Innovation Research Organizations, Tokyo University of Agriculture and Technology, 3-5-8 Saiwai-cho, Fuchu, Tokyo 183-8509, Japan

<sup>3</sup> Centre for Gene Regulation & Expression, School of Life Sciences, University of Dundee, Dow Street, Dundee, DD1 5EH, UK

<sup>4</sup> Department of Chemistry, Graduate School of Sciences and Engineering, Tokyo Metropolitan University, 1-1 Minamiosawa, Hachioji-shi, Tokyo 192-0397, Japan

<sup>5</sup> Biomolecular Characterization Team, RIKEN Advanced Science Institute, 2-1, Hirosawa, Wako, Saitama 351-0198, Japan

<sup>6</sup> La Trobe Institute for Molecular Science (LIMS) LIMS Building 1, Room 412 La Trobe University, Bundoora Victoria 3086, Australia

Running Title: PARN and ribosome biogenesis

To whom correspondence should be addressed:

Nobuhiro Takahashi, Ph. D.  
Applied Biological Science  
Tokyo University of Agriculture and Technology  
3-5-8 Saiwai-cho, Fuchu, Tokyo 183-8509, Japan  
Fax No. +81-042-367-5709,  
E-mail: [ntakahas@cc.tuat.ac.jp](mailto:ntakahas@cc.tuat.ac.jp)

## EXPERIMENTAL PROCEDURES

### Antibodies

The antibody sources and dilution ratios used in this study were as follows: rabbit polyclonal anti-PARN (Abcam, 27778; 1:2,000 for immunoblot analysis [IB], 1:250 for immunofluorescence staining [IF]), goat polyclonal anti-Bystin (Santa Cruz Biotechnology, 1:500 for IB), mouse monoclonal anti-Bystin (A-10) (Santa Cruz Biotechnology, 1:1,000 for IB), rabbit polyclonal anti-RIO2 (Bethyl Laboratories, 1:2,000 for IB), mouse monoclonal anti-FLAG (M2) (Sigma, 1:2,000 for IB), mouse monoclonal anti-Myc (4A6) (Upstate, 1:2,000 for IB), rabbit polyclonal anti-NOB1 (GeneTex, 1:2,000 for IB), mouse monoclonal anti-RPS3 (82-K) (Santa Cruz Biotechnology, 1:1,000 for IB), mouse monoclonal anti-beta-Actin Antibody (AC-15) (Santa Cruz Biotechnology, 1:2,000 for IB), mouse monoclonal anti-CKIe (4D7) (Santa Cruz Biotechnology, 1:1,000 for IB), mouse monoclonal anti-CKId (E-10) (Santa Cruz Biotechnology, 1:1,000 for IB), rabbit polyclonal anti-TSR1 (Abcam, 1:500 for IB), mouse polyclonal anti-UTP14A (Abnova, H00010813-B01P; 1:1,000 for IB), rabbit polyclonal anti-PNO1 (D-14) (Santa Cruz Biotechnology, 1:1,000 for IB), rabbit polyclonal anti-RRP12 (E-14) (Santa Cruz Biotechnology, 1:1,000 for IB), rabbit polyclonal anti-NOB1 (GeneTex, 1:2,000 for IB), rabbit polyclonal anti-EXOSC10 (Sigma, 1:1,000 for IB), rabbit polyclonal anti-NOC4L (G-22) (Santa Cruz Biotechnology, 1:1,000 for IB), rabbit polyclonal anti-FBL (H-140) (Santa Cruz Biotechnology, 1:1,000 for IB), mouse monoclonal anti-FBL (Cytoskeleton, 1:2,000 for IF), mouse monoclonal anti-UBF (F-9) (Santa Cruz Biotechnology, 1:50 for IF), rabbit polyclonal anti-B23 (C-19) (Santa Cruz Biotechnology, 1:1,000 for IB), mouse monoclonal, anti-B23 (Zymed, 1:400 for IF) and mouse monoclonal anti-GAPDH (6C5) (Ambion, 1:10,000 for IB). For immunofluorescence staining, the following secondary antibodies were used: FITC-conjugated anti-rabbit IgG (American Qualex, 1:500), Cy3-conjugated anti-mouse IgG (Sigma, 1:500) and Cy3-conjugated anti-rabbit IgG (Sigma, 1:500). For immunoblotting following secondary antibodies were used: HRP-linked anti-mouse IgG (Cell Signaling Technology, 1:10,000), HRP-linked anti-rabbit IgG (Cell Signaling Technology, 1:10,000), Anti-Goat IgG-Peroxidase antibody (Sigma, 1:10,000), alkaline phosphatase conjugated anti-mouse IgG (Cell Signaling Technology, 1:10,000) and alkaline phosphatase conjugated anti-rabbit IgG (Cell Signaling Technology, 1:10,000).

*Construction of Epitope-tagged Expression Plasmids*—For pcDNA3.1(+)-HF construction, 5'-GAAGAAGATATCGGGTTCTGGTGCCTACCCATATGACGTCCCGGACTACGCCGGATCTG GAGATTACAAGGATGACGACGATAAGTAACTCGAGTTG-3' and

5'-CAACTCGAGTTACTTATCGTCGTCATCCTTGTAATCTCCAGATCCG GCGTAGTCCGGGACGTCATATGGGTAGGCACCAGAACCCGATATCTTCTTC-3'

oligonucleotides were annealed, and was ligated into the *EcoRV/XhoI* sites of pcDNA3.1(+) vector. For the construction of pcDNA3.1(+)-HEF vector to express N-terminal HEF tagged protein,

5'-GAAGAAGCTAGCCACCATGGGATACCCATATGACGTCCCGGACTACGCCGGTTCTGGT GAGAATTTGTACTTCCAGGGTTCTGGTGCCGATTACAAGGATGACGACGATAAGGGTTCTG GTGCCAAGCTTGAAGAA-3' complementary oligonucleotide was synthesized with four oligonucleotides,

5'-GAAGAAGCTAGCCACCATGGGATACCCATATGACGTCCCGGACTACGCC-3',  
5'-GAACCCTGGAAGTACAAATTCTCACCAGAACCGGCGTAGTCCGGGACGT-3',

5'-GAATTTGTA CTTCCAGGGTTCTGGTGCCGATTACAAGGATGACGACGAT-3' and 5'-TTCTTCAAGCTTGGCACCAGAACCCTTATCGTCGTCATCCTTGTAAATCG-3' by PCR based extension. The synthesized oligonucleotide was ligated into *NheI/HindIII* sites of pcDNA3.1(+) vector. For the construction of pcDNA3.1(+)-HEF vector to express C-terminal HEF tag fusion protein, four oligonucleotide, 5'-GAAGATATCGGGTTCTGGTGCCGATTACAAGGATGACGACGATAAGG-3', 5'-TGGAAGTACAAATTCTCGGCACCAGAACCCTTATCGTCGTCATCCTT-3', 5'-CCGAGAATTTGTA CTTCCAGGGTTCTGGTGCCTACCCATATGACG-3' and 5'-CAACTCGAGTTAGGCGTAGTCCGGGACGTCATATGGGTAGGCA-3', were used to synthesize 5'-GAAGATATCGGGTTCTGGTGCCGATTACAAGGATGACGACGATAAGG GTTCTGGTGCCGAGAATTTGTA CTTCCAGGGTTCTGGTGCCTACCCATATGACGTCCCGGACTACGCCTAACTCGAGTTG-3' complementary oligonucleotide. The oligonucleotide was ligated into *EcoRV/XhoI* sites of pcDNA3.1(+) vector. For pcDNA5-FRT/TO-Myc construction, we ligated the annealed 5'-GAAGATATCGGAACAAAACTCATCTCAGAAGAGGATCTGCTCGAGTGACATATGCTCG AGCATCATCACCATCACCATGTCTAGAGAA-3' and 5'-TTCTCTAGACATGGTGATGGTGATGCTCGAGCATATGTCACTCGAGCAGATCCTCTT CTGAGATGAGTTTTTGTTCGATATCTTC-3' oligonucleotides first into the *EcoRV/XbaI* sites of pcDNA3.1(+) vector (pcDNA3.1(+)-Myc vector), cut out the DNA fragment encoding Myc-tag sequence with *EcoRV/ApaI* from the pcDNA3.1(+)-Myc vector, and ligated the fragment into *EcoRV/ApaI* sites of pcDNA5-FRT/TO. All constructs were verified by DNA sequencing.

*Construction of Epitope-tagged Expression Plasmids*—RT-PCR was performed with the Super Script II kit (Invitrogen) according to the manufacturer's instructions using total mRNA as template that was prepared from 293EBNA cells (Invitrogen). LTV1 (NM\_032860) cDNA, Bystin (NM\_004053) cDNA, PARN (NM\_002582) cDNA, were amplified by PCR using primer sets 5'-GAAGAAAAGCTTCACCATGGGACCTCACAGGAAGAAAAGCC-3' and 5'-CAAGAATTCCTAGCTTTAGACCCTCAACATTC-3' for LTV1, 5'-GAAGAAAAGCTTCACCATGGGACCCAAATTCAAGGCGGCCCGT-3' and 5'-CAAGAATTCCTCCACGGTGATGGGAACATCT-3' for Bystin, and 5'-GAAGAAAGATCTCACCATGGAGATAATCAGGAGCAATTTAAGA-3' and 5'-CAACTCGAGCCCGGGCCCATGTGTCAGGAACCTTCAAAGA-3' for PARN. The PCR products were cloned into the *HindIII/EcoRI* sites of pcDNA3.1(+) for LTV1 and Bystin or into the *BamHI/XhoI* sites for PARN cDNA. All cloned cDNAs were verified by DNA sequencing. The cloned cDNAs were sub-cloned into pcDNA3.1(+)-HF or pcDNA3.1(+)-HEF vector to fuse DNA fragment coding epitope tag sequence. DNA fragment coding tagged protein sequence was cut out and ligated into pcDNA5-FRT/TO vector. N-terminally tagged proteins were denoted as HEF-[protein name], and C-terminally tagged proteins were denoted as [protein name]-HF or HEF, respectively.

For tag fusion, Cloned LTV1 was cut out with *HindIII/EcoRV*, then ligated into the sites of *HindIII/EcoRV* of pcDNA3.1(+)-HF or pcDNA3.1(+)-HEF vector. The tag fused protein coding sequence was cut out with *HindIII/XhoI* and then ligated into the sites of *HindIII/XhoI* of pcDNA5-FRT/TO to make pcDNA5-FRT/TO-LTV1-HF or LTV1-HEF.

To make pcDNA5-FRT/TO-Bystin-HEF, firstly LTV1 coding sequence was removed from pcDNA5-FRT/TO-LTV1-HEF with *HindIII/EcoRV*, leaving tag coding sequence and then this vector was ligated with Bystin coding sequence, cut out from pcDNA3.1(+)-Bystin with *HindIII/EcoRV*.

To make pcDNA-FRT/TO-HEF-PARN, pcDNA3.1(+)-PARN was amplified by PCR with primer sets 5'-GAAGAAAGATCTATGGAGATAATCAGGAGCAATTTTAAGA-3' and 5'-CAACTCGAGTTACCATGTGTCAGGAAGCTTCAAAGA -3' for adjust frame and insert termination codon. Amplified sequence was ligated into pcDNA3.1(+)-HEF vector for N-terminally HEF tag fusion. Then pcDNA5-FRT/TO vector and pcDNA3.1(+)-HEF-PARN were cut with *HindIII* and *NheI* respectively, and klenow fill-in reaction was performed to convert protruding end to blunt end, and then cut with *XhoI*, and then HEF-PARN fragment and vector was ligated to make pcDNA-FRT/TO-PARN.

To make pcDNA5-FRT/TO-PARN-Myc, PARN coding sequence was cut out from pcDNA3.1(+)-PARN with *KpnI/SmaI*, then the fragment was ligated into *KpnI/EcoRV* sites of pcDNA5-FRT/TO-Myc vector. All constructs were verified by DNA sequencing.

*FLAG based Immunoprecipitation*— 48 hour after 1  $\mu\text{g/ml}$  doxycycline addition, doxycycline inducible epitope tagged protein expression cells were harvested from three 90-mm dishes, once washed with PBS and lysed by vigorous vortexing for 30 s in 1 ml lysis buffer (50 mM Tris-HCl pH 8.0, containing 150 mM NaCl, 0.5% IGEPAL-CA630 containing 1mM PMSF), and incubated on ice for 30 min. The soluble fraction was obtained by centrifugation at  $20,000 \times g$  for 30 min at  $4^\circ\text{C}$ . Total cell lysate was incubated with 10-15  $\mu\text{l}$  anti-FLAG M2 agarose beads for 3 hour at  $4^\circ\text{C}$ . After washing the agarose beads five times with 1 ml lysis buffer and once with 50 mM Tris-HCl pH 8.0, containing 150 mM NaCl, the complexes bound to the agarose beads were eluted with 500  $\mu\text{g/ml}$  FLAG peptide. The eluted complexes were submitted to further experiment.

*Cell Fractionation immunoprecipitation* —Sub-confluent T-Rex-293 cells, inducible LTV1-HEF or Bystin-HEF expression (Flp-In T-Rex-293) cells, were collected from 140-mm dish, lysed by vortexing for 10 sec with 500  $\mu\text{l}$  buffer A (16.7 mM Tris-HCl, pH 8.0, 50 mM NaCl, 5 mM  $\text{MgCl}_2$ , 1 mM PMSF) containing 0.1% Triton X-100, incubated for 5 min on ice, and centrifuged at  $1,200 \times g$  for 5 min. The supernatant was collected and pellet was once again suspended in 500  $\mu\text{l}$  buffer A, then vortexing for 10 sec and centrifuged at  $1,200 \times g$  for 5 min. The supernatant was collected and merged with precedent supernatant and treated as the cytoplasmic fraction. NaCl concentration of cytoplasmic fraction was adjusted by 5M NaCl to become 150 mM. On the other hand, pellet was lysed with 1 ml Buffer B (16.7 mM Tris-HCl, pH 8.0, 150 mM NaCl, 5 mM  $\text{MgCl}_2$ , 1 mM PMSF) containing 0.1% Triton X-100, incubated for 20 min on ice. Cytoplasmic fraction and suspension of pellet was centrifuged at  $20,000 \times g$  for 30 min at  $4^\circ\text{C}$  and obtained supernatant was treated as cytoplasmic and nuclear fraction, respectively. Each fraction was subsequently submitted to FLAG based immunoprecipitation assay described above.

*Protein and RNA separation from ribonucleoprotein complex*—Elate from two-step

immunoprecipitation (HF) or one-step immunoprecipitation (FLAG) was added with equal volume of 2x RNA extraction solution and phenol/chloroform (pH 8.0) and vigorously vortex mixed. Then aqueous phase and organic phase was separated with centrifugation at 20,000 x g for 30 min at 4°C. Aqueous phase containing RNA was collected to another tube and equal volume of 2-propanol was added. Four volume of 2-propanol was added to organic phase containing protein to become monophasic. RNA and protein were precipitated with centrifugation at 20,000 x g for 30 min at 4°C, respectively. Then the precipitates were rinsed with 75% ethanol, and air-dried. RNA and protein were submitted to further analysis.

*Immunoblotting of proteins*—Precipitated protein were dissolved in sample buffer then separated by SDS-PAGE and electrophoretically transferred to PVDF membranes. The membranes were blocked with 5% non-fat dried skim milk in PBS at 4°C at least for 1 hour, and incubated with the appropriate primary antibody overnight at 4°C. The membranes were washed three times with TBST (TBS containing 0.1% (w/v) Tween 20) for 10 min, incubated with secondary antibody conjugated with alkaline phosphatase for 1 hour at room temperature, washed three times with TBST for 10 min, and washed once with TBS for 5 min. Staining was performed in NBT (nitro-blue tetrazolium chloride) / BCIP (5-bromo-4-chloro-3'-Indolylphosphatase *p*-toluidine salt) solution, prepared by a (1:50) dilution of NBT/BCIP stock solution with alkaline phosphatase buffer (100 mM Tris-HCl pH 9.5, 100 mM NaCl, 50 mM MgCl<sub>2</sub>).

*Northern blotting*—Precipitated RNA from ribonucleoprotein complex or total RNA from whole cells were analyzed by non-RF based northern blotting method. Total RNA was isolated from whole cells using the RNeasy total RNA isolation system (Qiagen) according to the manufacturer's instructions. Without any mention, 2.5 µg of total RNA was loaded per lane. The RNA was separated on a 0.8% agarose/formaldehyde gel and electrophoresed in MOPS running buffer at 4 V/cm for 2.5 hour for analysis of large rRNAs, and a 9% polyacrylamide/7.5 M urea gel in 0.5x TBE running buffer at 12.5 V/cm for 2.5 hour for small RNAs. Large RNA separated by agarose was capillary transferred in 20x SSC buffer and small RNA separated by PAGE was electrotransferred using semi-dry blotting apparatus with 0.5x TBE buffer to Hybond-N+ membrane (GE Healthcare). Blotted membrane was dried and UV-cross linked then blocked with pre-hybridization buffer (containing 5X SSC, 20 mM NaH<sub>2</sub>PO<sub>4</sub> pH 7.5, 7% SDS, 2X Denhardt's Solution and 40 µg/ml sheared salmon sperm DNA) at least for 1 hour. After blocking, oligonucleotide end labeled with biotin was added to each blot, and then hybridized overnight at 50°C. Then, the membrane was washed twice with Non-Stringent Wash Solution (3X SSC, 25 mM NaH<sub>2</sub>PO<sub>4</sub> pH 7.5, 5% SDS) for 15 min, and washed twice with Stringent Wash Solution (1X SSC, 1% SDS) for 15 min. Membrane was submit to subsequent chemiluminescent based method with chemiluminescent nucleic acid detection module (Thermo Fisher scientific), and detected with LAS4000 luminescent image analyzer (FUJI FILM).

*Biotin end labeling with 16-dUTP*—Following oligonucleotides were end labeled with biotin using Biotin 3' End DNA Labeling kit (Pierce); 18S probe  
 (5'-GGCGACTACCATCGAAAGTTGATAG-3'), ITS1 probe  
 (5'-AACGCGCTAGGTACCTGGACGG-3'), 5.8S probe  
 (5'-AGACAGGCGTAGCCCCGGGAGGAA-3'), 18S probe

(5'-GGCGACTACCATCGAAAGTTGATAG-3'), 28S probe  
 (5'-TTCCGAGGGAACCAGCTACTAGAT-3'), 5'ITS1 probe  
 (5'-CCTCGCCCTCCGGGCTCCGTTAATTGATC-3') (1), U3 probe  
 (5'-ATCATCAATGGCTGACGGCAGTTG-3'), 7SK probe (5'-AGGCAGACTGCCACATGCAG-3'),  
 U6 probe (5'-ACGAATTTGCGTGTTCATCCTTGCG-3'), 5S probe  
 (5'-TTCCGAGATCAGACGAGATCGG-3'), 18S-3' probe (1837-1856 of 18S rRNA:  
 5'-AGGTTACCTACGGAAACCT-3').

*Fluorescent in situ hybridization (FISH)*—FISH was performed as described (1). In brief, HeLa cells were seeded on collagen coated culture slide, and fixed with 4% formaldehyde in PBS, washed twice with PBS and permeabilized for 16 hour at 4°C in 70% ethanol. After washing the cells two times with 2x SSC, 10% formamide Rehydrate, hybridization was performed for 3 hour at 37°C in hybridization solution consisting of 10% formamide, 2x SSC, 0.5 mg/ml yeast tRNA, 10% dextran sulfate, 50 mg/ml BSA and 10 mM ribonucleoside vanadyl complexes containing 0.5 ng/ml of 3'-Cy3 labeled 5'ITS1 (5'-CCTCGCCCTCCGGGCTCCGTTAATTGATC-3') oligonucleotide. The slides were then washed twice with 2x SSC, 10% formamide and once with PBS. If required, following immunofluorescent staining was performed and then mounted with Vectashield. The resulting slides were observed with an Axiovert 200 M microscope (Carl Zeiss, Germany).

*Immunofluorescence Staining*—Cells were washed with PBS followed by fixation with 3.7% formaldehyde in PBS for 10 min at room temperature. After washing twice with PBST (0.05% w/v Tween 20), the cells were permeabilized with PBS containing 0.1% (w/v) Triton X-100 for 5 min at room temperature and washed once with PBST. The cells were then blocked with 3% (w/v) non-fat dried milk in PBS for 1 h, and incubated with the appropriate primary antibody for 1 hour at room temperature. The cells were washed three times in PBST for 10 min and then incubated with fluorochrome-conjugated secondary antibody for 1 hour at room temperature. The cells were washed three times in PBST for 10 min and then mounted with Vectashield. The resulting cells were examined with an Axiovert 200 M microscope (Carl Zeiss, Germany).

*Proliferation Assay*—CFDA (carboxyfluorescein diacetate, succinimidyl ester) is a cell permeable fluorochrome, emits its fluorescent after cleavage of intracellular esterase. CFDA also reacts with intracellular amines (e.g., proteins), and is retained in the cell unless cells are proliferated. After the cell division, this fluorochrome is diluted, so that highly proliferative cells show weaker staining than quiescent ones. At 24 hours after stealth siRNA transfection, 293 EBNA were labeled with CFDA according to manufacture's instruction. The cells were cultivated further for 48 hours, and submitted to immunofluorescence staining as described above.

*Salt sensitivity of LTV1 associated pre-40S complex*— The complexes bound to the anti FLAG conjugated agarose beads were incubated buffer containing 50 mM Tris-HCl pH 8.0 and indicated concentration of NaCl incubated for 30 min on ice. Then the beads were washed twice with lysis buffer and once with 50 mM Tris-HCl pH 8.0, 150 mM NaCl and eluted with buffer containing the FLAG peptide as described above.

---

*Ribonuclease Treatment of the Immunoprecipitated Protein Complexes prepared by two-step purification*—Pre-40S complex precipitated with LTV1 or Bystin in FLAG eluate were incubated with 50 mM Tris-HCl pH 8.0, 150 mM NaCl containing 10 µg/ml RNase A for 10 min at 37°C, incubated for 30 min on ice, then submitted to following HA-Pull-down described above.

*Glycerol Density Gradient Ultracentrifugation of protein complex*—LTV1-associated pre-40S complex pulled down with anti-FLAG beads was layered on 10-25% (v/v) Glycerol density gradient buffered with 50 mM Tris-HCl pH8.0, 150 mM NaCl, and centrifuged with Beckman MLS50 rotor at 45,000 rpm (ave. 162,500 × g) for 4 hour at 4°C, and then separated into 10 fractions (500 µl each). Eluate was measured at 540 nm with ProTeam LCTM System210 (ISCO, Inc Lincoln NE, USA).

*Polysome analysis with sucrose density gradient*—72 hour from transfection, cells were harvested by 5 min after the addition of 50 µg /ml cycloheximide to the medium. Equal numbers of cells were pelleted by centrifugation at 1,200 x g for 5 min at 4°C. Cells were lysed in 20 mM Tris-HCl (pH 7.2), 130 mM KCl, 10 mM MgCl<sub>2</sub>, 2.5 mM DTT, 0.5% IGEPAL-CA630, 0.5% sodium deoxycholate, 10 µg /ml Cycloheximide, 0.2 mg/ml heparin for 15 min at 4°C. The cell suspensions were centrifuged at 8,000 x g for 10 min, and the supernatants were layered on 10 to 45% (wt/wt) sucrose density gradients in 10 mM Tris-HCl (pH 7.2), 60 mM KCl, 10 mM MgCl<sub>2</sub>, 1 mM DTT, 0.1 mg/ml heparin. The gradients were centrifuged at 45,000 rpm for 99 min at 4°C with Beckman MLS50 rotor and fractionated into 10 fractions. The absorbance at 254 nm was measured continuously with ProTeam LCTM System210 (ISCO, Inc Lincoln NE, USA).

---

## Supplementary Figure Legends

### Supplementary Figure S1. Assignment of LTV1- or Bystin-associated pre-rRNAs

**A)** LTV1-associated RNAs were separated by agarose gel electrophoresis and stained with ethidium bromide. Lane 1, total RNA (stained bands corresponding to 28S or 18S rRNAs are indicated to the left); lanes 2 and 3, control and LTV1-HF-associated RNAs isolated during the first step of purification, respectively; lanes 4 and 5, control and LTV1-HF-associated RNAs isolated during the second step of purification. **B)** Structure of the primary rRNA transcript (47S), outline of pre-rRNA processing in mammalian cells modified from Yoshikawa et al. (1), and oligonucleotide probes used for hybridization analysis. The main processing sites 1 and 3 denote the mature ends of 18S rRNA, site 4' denotes the 3' end of 5.8S, and sites 3' and 02 are for 28S (2). The external and internal transcribed spacers (ETS and ITS, respectively) contain additional cleavage sites designated 01, A0, E, C, 2, and 4a. Pre-rRNAs (45S, 41S, 30S, 36S, 21S, 18S-E, 32S, and 12S) produced by cleavage at those sites are indicated. **C)** LTV1-associated RNAs prepared by two-step purification were detected by northern blotting with probes for 18S, 5'ITS1, and 28S as indicated below the corresponding blots. For each probe, lane 1 corresponds to total RNA, lane 2 to the control, and lane 3 to LTV1-HF-associated RNAs. **D)** Schematic diagram of the RNase H targeting method for detecting the 3'-end sequence of pre- or mature 18S rRNA. DNA-RNA hybrids were formed by annealing pre- and mature 18S rRNAs with a DNA oligonucleotide corresponding to bases 1800–1823 of the mature 18S rRNA sequence, with subsequent digestion with RNase H. The resulting RNA fragments are detected by northern blotting with probe 18S-3' (corresponding to 1837–1856) or 5'ITS1 (corresponding to 1863–1891). **E)** RNA fragments prepared from LTV1- or Bystin-associated pre-40S particles were detected by SYBR Gold staining or by northern blotting with probe 18S-3' or 5'ITS1 after denaturing urea-PAGE. In each stained gel, lanes 1–4 (lanes 2–5 for SYBR Gold staining) represent reactions that lacked a targeting probe, and lanes 5–8 (6–9 for SYBR Gold staining) represent RNA fragments produced by targeted RNase H digestion. Marker oligonucleotides and sizes are indicated to the left of the SYBR Gold-stained gel. Arrows indicate oligonucleotides containing approximately 50, 60, and 90 nucleotides generated from 18S', 18S'E1, and 18S'E'2, respectively, by targeted RNase H digestion.

### Supplementary Figure S2. Nuclear localization of PARN and 18S-E

**A)** LTV1- or Bystin-associated pre-40S particles were isolated from cytoplasmic extract (Cy) or nuclear extract (Nu) prepared from T-Rex 293 cells or Flp-In T-Rex 293 cells expressing LTV1-HEF or Bystin-HEF inducibly with doxycycline. RNAs are separated by agarose gel electrophoresis and detected by northern blotting with the probes indicated. Sizes of the corresponding pre-rRNAs are indicated to the left. **B)** HEF-PARN was immunoprecipitated (IP) with anti-FLAG-conjugated beads from HEF-PARN-expressing cells that were transfected (TF) with (+) or without (–) LTV1-Myc vector. Proteins were detected by immunoblotting with the antibodies against proteins indicated to the left. **C)** FISH analysis of RNase-treated HeLa cells. After RNase treatment, RNA species were visualized with the 5'ITS1 probe (red). The cells were also subjected to immunocytochemical analysis with anti-PARN (green). 5'ITS1 image on the right, and anti-PARN image on the left. Both images were acquired at the same time point. Scale



bar, 10  $\mu$ m.

**Supplementary Figure S3.** Effect of PARN knockdown on 293EBNA cell proliferation and processing of pre-rRNAs

**A)** siRNA-treated cells were stained with anti-PARN and secondary antibody conjugated with Cy3 (red) or with carboxyfluorescein diacetate ester (CFDA SE, green). DAPI staining was overlaid with the Merge image (Merge + DAPI). Scale bar, 10  $\mu$ m. **B)** After treatment with control scRNA (sc) or siRNA (si), RNAs in 293EBNA cells were detected by northern blotting with probes for 18S, 5'ITS1, 28S, and ITS1. Northern blotting was also done using probes for the RNAs U3, 7SK, U6, and 5S after separation by denaturing urea-PAGE. PARN and GAPDH were detected by immunoblotting (IB). rRNAs were separated with 0.8% agarose gel electrophoresis.

**Supplementary Figure S4. Function of PARN in Bystin-associated pre-40S particles**

**A)** RNAs extracted from HeLa cells transfected (TF) with control scRNA (sc) or siRNA (si) for PARN knockdown were co-transfected for 48 h with empty vector (Vec), expression vector containing an siRNA-resistant sequence encoding PARN-WT-Myc, or expression vector containing an siRNA-resistant sequence encoding PARN-D28A-Myc. RNAs were detected by northern blotting with the probes indicated under each blot. Proteins were detected by immunoblotting (IB) with the antibodies indicated. **B)** The plasmid encoding PARN-WT-Myc was mixed with pcDNA3.1 empty vector (proportion: 0:1, 1:4, 1:2, or 1:0) and transfected into Flp-In T-Rex 293 cells expressing Bystin-HEF. The protein components of the isolated Bystin-HEF-associated pre-40S particles were detected by immunoblotting with the antibodies indicated, and the RNA components were detected by northern blotting with probes for 18S ITS1, and 5'ITS1. **C)** Bystin-HEF-associated pre-40S particles were immunoprecipitated (IP) with anti-FLAG-conjugated beads from cytoplasmic (Cy) or nuclear (Nu) extract prepared from Flp-In T-Rex 293 cells expressing Bystin-HEF that were transfected with PARN-WT-Myc or PARN-D28A-Myc expression vector. The protein components of the isolated pre-40S particles were detected by immunoblotting with the antibodies indicated to the left.

(1) Yoshikawa H., Ishikawa H., Izumikawa K., Miura Y., Hayano T., Isobe T., Simpson R.J. and Takahashi N., Human nucleolar protein Nop52 (RRP1/NNP-1) is involved in site 2 cleavage in internal transcribed spacer 1 of pre-rRNAs at early stages of ribosome biogenesis. *Nuc. Acids Res.* 2015, 43(11):5524-5536

(2) Sato, S., Ishikawa, H., Yoshikawa, H., Izumikawa, K., Simpson, R.J. and Takahashi, N., Collaborator of alternative reading frame protein (CARF) regulates early processing of pre-ribosomal RNA by retaining XRN2 (5'-3' exoribonuclease) in the nucleoplasm. *Nucleic Acids Research*, 43(21):10397-10410, 2015

## Supplementary Table 1 The LTV1-associated proteins identified by mass-based analysis

Proteins involved or expected to be involved in ribosome biogenesis are indicated. Proteins are grouped based on SwissProt classification. Proteins were identified by LC-MS/MS (Q-Tof2). Proteins detected in mock are not listed in this table. Uniprot KB accession numbers, entry names, protein names as well as gene symbols are shown. For proteins having yeast orthologs, the gene names are indicated (obtained by Blink analysis of the NCBI database).

| Uniprot KB accession                                   | Uniprot KB Entry Name | protein name                                           | Gene name | Yeast Homolog |
|--------------------------------------------------------|-----------------------|--------------------------------------------------------|-----------|---------------|
| <b>40S subunit trans-acting factor (Yeast homolog)</b> |                       |                                                        |           |               |
| O95453                                                 | PARN_HUMAN            | Poly(A)-specific ribonuclease PARN                     | PARN      |               |
| Q2NL82                                                 | TSR1_HUMAN            | Pre-rRNA-processing protein TSR1 homolog               | TSR1      | TSR1          |
| Q96GA3                                                 | LTV1_HUMAN            | Protein LTV1 homolog                                   | LTV1      | LTV1          |
| Q13895                                                 | BYST_HUMAN            | Bystin                                                 | BYSL      | ENP1          |
| Q5JTH9                                                 | RRP12_HUMAN           | RRP12-like protein                                     | RRP12     | RRP12         |
| Q9ULX3                                                 | NOB1_HUMAN            | RNA-binding protein NOB1                               | NOB1      | NOB1          |
| Q9NRX1                                                 | PNO1_HUMAN            | RNA-binding protein PNO, DIM2                          | PNO1      | PNO1          |
| Q9BVS4                                                 | RIOK2_HUMAN           | Serine/threonine-protein kinase RIO2                   | RIOK2     | RIOK2         |
| Q9NSI2                                                 | CU070_HUMAN           | Uncharacterized protein C21orf70                       | C21orf70  |               |
| <b>rRNA processing</b>                                 |                       |                                                        |           |               |
| P19338                                                 | NUCL_HUMAN            | Nucleolin                                              | NCL       |               |
| Q9BVJ6                                                 | UT14A_HUMAN           | U3 small nucleolar RNA-associated protein 14 homolog A | UTP14A    |               |
| Q9H6R4                                                 | NOL6_HUMAN            | Nucleolar protein 6                                    | NOL6      |               |
| Q9NR30                                                 | DDX21_HUMAN           | Nucleolar RNA helicase 2                               | DDX21     |               |
| <b>RNA Helicase</b>                                    |                       |                                                        |           |               |
| Q08211                                                 | DHX9_HUMAN            | ATP-dependent RNA helicase A                           | DHX9      |               |
| P17844                                                 | DDX5_HUMAN            | Probable ATP-dependent RNA helicase DDX5               | DDX5      |               |
| Q9UJV9                                                 | DDX41_HUMAN           | Probable ATP-dependent RNA helicase DDX41              | DDX41     |               |
| Q6P158                                                 | DHX57_HUMAN           | Putative ATP-dependent RNA helicase DHX57              | DHX57     |               |

Supplementary Table 2 Identification of proteins associated with the LTV1 by LC-MS/MS analysis with Q-Tof2

Summary of the LTV1-associated proteins identified by LC-MS/MS analysis with Q-Tof2. a. Positions of amino- (Start) and carboxyl- (End) termini of the identified peptides within the amino acid sequence are shown. b. The significance threshold ( $p = 0.05$ ) and probability-based MOWSE scores obtained from a database search by MASCOT are shown. Scores that exceed their threshold are statistically confident with more than 95% certainty. c. The charge state and observed precursor mass are indicated.

| Uniprot KB accession                                   | Uniprot KB Entry Name | protein name                             | Gene Symbol | Start | Sequence         | End | Charge State | Mascot Score | Observed Precursor Mass |
|--------------------------------------------------------|-----------------------|------------------------------------------|-------------|-------|------------------|-----|--------------|--------------|-------------------------|
| <b>40S subunit trans-acting factor (Yeast homolog)</b> |                       |                                          |             |       |                  |     |              |              |                         |
| Q2NL82                                                 | TSR1_HUMAN            | Pre-rRNA-processing protein TSR1 homolog | TSR1        | 241   | QQHLAFR          | 247 | 2+           | 41.35        | 450.24                  |
|                                                        |                       |                                          |             | 280   | GQTLNVNR         | 287 | 2+           | 41.81        | 451.25                  |
|                                                        |                       |                                          |             | 66    | EAVLAEKR         | 73  | 2+           | 59.48        | 458.28                  |
|                                                        |                       |                                          |             | 2     | AAHRPGPLK        | 10  | 2+           | 33.45        | 473.79                  |
|                                                        |                       |                                          |             | 601   | DPGNTEPVK        | 609 | 2+           | 58.68        | 478.75                  |
|                                                        |                       |                                          |             | 697   | VVLSGHPFK        | 705 | 2+           | 54.71        | 492.31                  |
|                                                        |                       |                                          |             | 591   | MSVLNMVVR        | 599 | 2+           | 56.29        | 540.79                  |
|                                                        |                       |                                          |             | 518   | ENLPQDYAR        | 526 | 2+           | 49.9         | 553.34                  |
|                                                        |                       |                                          |             | 761   | SQDTVLMNLYK      | 771 | 2+           | 53.91        | 664.38                  |
|                                                        |                       |                                          |             | 625   | ASPLFSQHTAADK    | 637 | 3+           | 67.9         | 458.29                  |
|                                                        |                       |                                          |             | 527   | IFQFQNFTNTR      | 537 | 2+           | 70.51        | 708.47                  |
|                                                        |                       |                                          |             | 761   | SQDTVLMNLYKR     | 772 | 2+           | 48.54        | 742.47                  |
|                                                        |                       |                                          |             | 94    | ISLPEAMQLLQDR    | 106 | 2+           | 74.28        | 757.5                   |
|                                                        |                       |                                          |             | 288   | LLHIVGYGDFQMK    | 300 | 3+           | 42.51        | 507.67                  |
|                                                        |                       |                                          |             | 94    | ISLPEAMQLLQDR    | 106 | 2+           | 60.11        | 765.45                  |
|                                                        |                       |                                          |             | 721   | EDVLWFKPVELR     | 732 | 2+           | 49.08        | 766.02                  |
|                                                        |                       |                                          |             | 301   | QIDAPGDPFPLNPR   | 314 | 2+           | 44.46        | 768.99                  |
|                                                        |                       |                                          |             | 288   | LLHIVGYGDFQMK    | 300 | 2+           | 36.62        | 769                     |
|                                                        |                       |                                          |             | 527   | IFQFQNFTNTRK     | 538 | 2+           | 38.96        | 772.45                  |
|                                                        |                       |                                          |             | 79    | DGPPHQVLVVPLHSR  | 93  | 3+           | 57.72        | 551                     |
|                                                        |                       |                                          |             | 220   | LLLLDTQQEAGMLLR  | 234 | 2+           | 108.75       | 857.6                   |
|                                                        |                       |                                          |             | 575   | QGTPLIAFSLLPHEQK | 590 | 2+           | 62.01        | 881.6                   |
|                                                        |                       |                                          |             | 777   | WTYDPYVPEPVPWLK  | 791 | 2+           | 42.04        | 945.6                   |
|                                                        |                       |                                          |             | 511   | TSPWDPKENLPQDYAR | 526 | 3+           | 41.63        | 639.71                  |

|        |            |                      |      |     |                        |     |    |       |        |
|--------|------------|----------------------|------|-----|------------------------|-----|----|-------|--------|
|        |            |                      |      | 672 | SNGMHSLIATGHLMSVDPDR   | 691 | 3+ | 36.9  | 724.09 |
|        |            |                      |      | 280 | GQTLNVNRLRHIVGYGDFQMK  | 300 | 3+ | 34.81 | 801.86 |
|        |            |                      |      | 251 | AYLFAHAVDFVPSEENNLVGLK | 273 | 3+ | 63.66 | 845.49 |
| Q96GA3 | LTV1_HUMAN | Protein LTV1 homolog | LTV1 | 431 | KQAIKEER               | 438 | 2+ | 40.96 | 501.32 |
|        |            |                      |      | 382 | TGIPLNLVLPK            | 391 | 2+ | 40.4  | 526.38 |
|        |            |                      |      | 15  | AVSFHLVHR              | 23  | 2+ | 57.16 | 533.35 |
|        |            |                      |      | 14  | KAVSFHLVHR             | 23  | 2+ | 76.51 | 597.4  |
|        |            |                      |      | 402 | IQMINGSDLPK            | 412 | 2+ | 51.22 | 616.33 |
|        |            |                      |      | 253 | NEQLTLHDER             | 262 | 2+ | 75.74 | 627.86 |
|        |            |                      |      | 27  | DPLAADESAPQR           | 38  | 2+ | 88.42 | 635.41 |
|        |            |                      |      | 294 | LQEVLDYK               | 303 | 2+ | 83.04 | 642.88 |
|        |            |                      |      | 97  | EETLVIPSTGIK           | 108 | 2+ | 43.99 | 643.92 |
|        |            |                      |      | 170 | ATGEEGMDIQK            | 181 | 2+ | 62.72 | 662.34 |
|        |            |                      |      | 252 | RNEQLTLHDER            | 262 | 3+ | 44.89 | 470.94 |
|        |            |                      |      | 240 | FTEYSMTSSVMR           | 251 | 2+ | 75.95 | 727.87 |
|        |            |                      |      | 294 | LQEVLDYKKEK            | 305 | 3+ | 32.26 | 514.64 |
|        |            |                      |      | 225 | AIADHLFWSEETK          | 237 | 2+ | 77.15 | 773.95 |
|        |            |                      |      | 24  | SQRDPLAADESAPQR        | 38  | 3+ | 65.24 | 547.65 |
|        |            |                      |      | 253 | NEQLTLHDERFEK          | 265 | 3+ | 30.66 | 553.65 |
|        |            |                      |      | 93  | REEKEETLVIPSTGIK       | 108 | 3+ | 59.21 | 610.44 |
|        |            |                      |      | 74  | EPSGPSELIPSSTFSAHNR    | 92  | 3+ | 55.76 | 671.71 |
| Q13895 | BYST_HUMAN | Bystin               | BYSL | 190 | EVLSK                  | 194 | 1+ | 33.44 | 575.45 |
|        |            |                      |      | 420 | ELQSAVPR               | 427 | 2+ | 62.08 | 450.32 |
|        |            |                      |      | 399 | EALLELLR               | 406 | 2+ | 65.49 | 478.87 |
|        |            |                      |      | 146 | TLADIIMEK              | 154 | 2+ | 63.59 | 517.33 |
|        |            |                      |      | 419 | RELQSAVPR              | 427 | 2+ | 30.34 | 528.38 |
|        |            |                      |      | 258 | VRDDVAEYK              | 266 | 2+ | 39.82 | 547.86 |
|        |            |                      |      | 249 | FYNLVLLPR              | 257 | 2+ | 50.65 | 567.88 |
|        |            |                      |      | 304 | EAIIVGSITK             | 314 | 2+ | 58.84 | 572.4  |
|        |            |                      |      | 389 | YKADLATDQK             | 398 | 2+ | 51.16 | 576.89 |
|        |            |                      |      | 145 | RTLADIIMEK             | 154 | 2+ | 53.05 | 595.43 |
|        |            |                      |      | 258 | VRDDVAEYKR             | 267 | 2+ | 30.17 | 625.92 |
|        |            |                      |      | 268 | LNFHLYMALK             | 277 | 2+ | 59.33 | 633.44 |
|        |            |                      |      | 41  | GTGEAEVEYVGP           | 53  | 2+ | 52.75 | 697.37 |

|                        |             |                                                     |       |      |                   |      |    |       |        |
|------------------------|-------------|-----------------------------------------------------|-------|------|-------------------|------|----|-------|--------|
|                        |             |                                                     |       | 407  | LQPHPQLSPEIR      | 418  | 3+ | 50.68 | 472.34 |
|                        |             |                                                     |       | 267  | RLNFHLYMALK       | 277  | 3+ | 34.36 | 474.64 |
|                        |             |                                                     |       | 16   | HAPLADQILAGNAVR   | 30   | 2+ | 45.13 | 773.55 |
|                        |             |                                                     |       | 329  | IAEMEYSGANSIFLR   | 343  | 2+ | 65.7  | 859.05 |
| Q5JTH9                 | RRP12_HUMAN | RRP12-like protein                                  | RRP12 | 266  | GSEFMFEK          | 273  | 2+ | 34.93 | 495.79 |
|                        |             |                                                     |       | 1129 | VLATQPGPGR        | 1138 | 2+ | 50.53 | 498.34 |
|                        |             |                                                     |       | 740  | VLDPASSDFTR       | 750  | 2+ | 50.37 | 604.38 |
|                        |             |                                                     |       | 600  | AMDLAQAGSTVESK    | 613  | 2+ | 53.85 | 704.39 |
| Q9NRX1                 | PNO1_HUMAN  | RNA-binding protein PNO                             | PNO1  | 192  | FTIENVTR          | 199  | 2+ | 37.12 | 490.35 |
|                        |             |                                                     |       | 12   | AEEGFTQVTR        | 21   | 2+ | 51.66 | 569.34 |
|                        |             |                                                     |       | 47   | MDTEEARPAK        | 56   | 2+ | 59.42 | 582.32 |
|                        |             |                                                     |       | 31   | QAEQLSAAGEGGDAGR  | 46   | 2+ | 47.93 | 758.89 |
|                        |             |                                                     |       | 95   | IFTPIVEHLGLQIR    | 108  | 3+ | 60.21 | 546.04 |
| Q9BVS4                 | RIOK2_HUMAN | Serine/threonine-protein kinase RIO2                | RIOK2 | 75   | LTNAGYDYLALK      | 86   | 2+ | 67.03 | 671.41 |
|                        |             |                                                     |       | 172  | KFPVPKPIDYNR      | 183  | 3+ | 42.79 | 491.99 |
|                        |             |                                                     |       | 277  | FSYESELFPTFK      | 288  | 2+ | 36.36 | 747.94 |
|                        |             |                                                     |       | 29   | NHEIVPGSLIASIASLK | 45   | 3+ | 67.55 | 583.78 |
| Q9ULX3                 | NOB1_HUMAN  | RNA-binding protein NOB1                            | NOB1  | 398  | RLNPNASR          | 405  | 2+ | 33.84 | 464.32 |
|                        |             |                                                     |       | 46   | LAVLPYELR         | 54   | 2+ | 30.56 | 537.41 |
|                        |             |                                                     |       | 32   | EVVTEIRDK         | 40   | 2+ | 33.68 | 544.83 |
|                        |             |                                                     |       | 334  | YAINPHLTEDQR      | 345  | 3+ | 31.84 | 486.27 |
|                        |             |                                                     |       | 2    | APVEHVADAGAFRL    | 16   | 2+ | 68.48 | 776.54 |
| <b>rRNA processing</b> |             |                                                     |       |      |                   |      |    |       |        |
| P19338                 | NUCL_HUMAN  | Nucleolin                                           | NCL   | 325  | TGISDVFAK         | 333  | 2+ | 79.21 | 469.29 |
|                        |             |                                                     |       | 478  | NSTWSGESK         | 486  | 2+ | 47.82 | 498.24 |
|                        |             |                                                     |       | 334  | NDLAVVDVR         | 342  | 2+ | 54.98 | 500.84 |
|                        |             |                                                     |       | 640  | VTLDWAKPK         | 648  | 2+ | 46.76 | 529.33 |
|                        |             |                                                     |       | 428  | SKGIAYIEFK        | 437  | 2+ | 62.36 | 578.4  |
|                        |             |                                                     |       | 458  | SISLYYTGEK        | 467  | 2+ | 39.95 | 580.87 |
|                        |             |                                                     |       | 600  | IVTDRETGSSK       | 610  | 2+ | 44.1  | 596.83 |
|                        |             |                                                     |       | 578  | GLSEDTTEETLK      | 589  | 2+ | 50.71 | 661.9  |
| Q9BVJ6                 | UT14A_HUMAN | U3 small nucleolar RNA-associated protein 14 UTP14A |       | 321  | QAMQEQLSK         | 329  | 2+ | 30.94 | 539.78 |
|                        |             |                                                     |       | 232  | ALQSYEAK          | 240  | 2+ | 19.38 | 536.79 |
|                        |             |                                                     |       | 478  | ASSEGTIPQVQR      | 489  | 2+ | 21.12 | 636.87 |

|                     |             |                                           |       |      |                    |      |    |       |        |
|---------------------|-------------|-------------------------------------------|-------|------|--------------------|------|----|-------|--------|
|                     |             |                                           |       | 153  | QAEQLVFPLEK        | 163  | 2+ | 23.75 | 651.38 |
| Q9H6R4              | NOL6_HUMAN  | Nucleolar protein 6                       | NOL6  | 942  | AQLPVMVIVTPQDR     | 955  | 2+ | 35.35 | 792.03 |
|                     |             |                                           |       | 808  | EVQSPEGMISLR       | 819  | 2+ | 12.07 | 681.43 |
|                     |             |                                           |       | 281  | GQSPAGDGSPEPPTPR   | 296  | 2+ | 21.44 | 775.4  |
|                     |             |                                           |       | 942  | AQLPVMVIVTPQDR     | 955  | 2+ | 14.74 | 783.99 |
| <b>RNA Helicase</b> |             |                                           |       |      |                    |      |    |       |        |
| Q08211              | DHX9_HUMAN  | ATP-dependent RNA helicase A              | DHX9  | 810  | LGGIGQFLAK         | 819  | 2+ | 33.82 | 502.36 |
|                     |             |                                           |       | 930  | MGGEEAEIR          | 938  | 2+ | 57.21 | 504.26 |
|                     |             |                                           |       | 622  | LSMSQLNEK          | 630  | 2+ | 39.48 | 533.28 |
|                     |             |                                           |       | 529  | DVVQAYPEVR         | 538  | 2+ | 43.5  | 588.32 |
|                     |             |                                           |       | 1105 | AAMEALVVEVTK       | 1116 | 2+ | 33.55 | 638.87 |
|                     |             |                                           |       | 669  | HLEMNPHFGSHR       | 680  | 3+ | 45.29 | 493.28 |
|                     |             |                                           |       | 249  | QLYHLGVVEAYSGLTK   | 264  | 3+ | 49.88 | 593.4  |
|                     |             |                                           |       | 1137 | QISRPSAAGINLMIGSTR | 1154 | 3+ | 36.23 | 630.03 |
| P17844              | DDX5_HUMAN  | Probable ATP-dependent RNA helicase DDX5  | DDX5  | 471  | LLQLVEDR           | 478  | 2+ | 34.62 | 493.37 |
|                     |             |                                           |       | 392  | APILIATDVASR       | 403  | 2+ | 67.71 | 613.96 |
|                     |             |                                           |       | 438  | TGTAYTFFTPNNIK     | 451  | 2+ | 42.78 | 788.03 |
| Q9UJV9              | DDX41_HUMAN | Probable ATP-dependent RNA helicase DDX4  | DDX41 | 116  | ILESVAEGR          | 124  | 2+ | 40.87 | 487.34 |
|                     |             |                                           |       | 456  | GVEAVAIHGGK        | 466  | 2+ | 58.62 | 519.35 |
| Q6P158              | DHX57_HUMAN | Putative ATP-dependent RNA helicase DHX57 | DHX57 | 604  | ISAISVAER          | 612  | 2+ | 42.21 | 473.33 |
|                     |             |                                           |       | 533  | QFQSILQER          | 541  | 2+ | 29.85 | 574.88 |
| Q9NR30              | DDX21_HUMAN | Nucleolar RNA helicase 2                  | DDX21 | 237  | TFSFAIPLIEK        | 247  | 2+ | 31.36 | 633.47 |
|                     |             |                                           |       | 33   | KEKPK              | 37   | 1+ | 11.73 | 629.46 |
|                     |             |                                           |       | 205  | GVTFLFPIQAK        | 215  | 2+ | 25.86 | 610.91 |

**Supplementary Table 3.** Summary of the PARN-associated proteins identified by MALDI-MS/MS analysis with TOF5800

| Uniprot KB accession | Uniprot KB entry name | Protein name                                           | Gene symbol | Start <sup>a</sup> | Sequence             | End <sup>a</sup> | Charge state <sup>c</sup> | Mascot score <sup>b</sup> | Observed precursor mass <sup>c</sup> |
|----------------------|-----------------------|--------------------------------------------------------|-------------|--------------------|----------------------|------------------|---------------------------|---------------------------|--------------------------------------|
| <b>PARN IP1</b>      |                       |                                                        |             |                    |                      |                  |                           |                           |                                      |
| Q00839               | HNRPU_HUMAN           | Heterogeneous nuclear ribonucleoprotein U              | HNRNPU      | 576                | NFILDQTNVSAQAQR      | 590              | 1+                        | 62.15                     | 1646.79                              |
|                      |                       |                                                        |             | 256                | GYFEYIEENKYSR        | 268              | 1+                        | 41.09                     | 1696.73                              |
|                      |                       |                                                        |             | 187                | SSGPTSLFAVTVAPPGAR   | 204              | 1+                        | 80.98                     | 1713.86                              |
| Q9BVJ6               | UT14A_HUMAN           | U3 small nucleolar RNA-associated protein 14 homolog A | UTP14A      | 263                | KALKEFEQLR           | 272              | 1+                        | 16.06                     | 1260.67                              |
|                      |                       |                                                        |             | 115                | TVELPLNKEEIER        | 127              | 1+                        | 46.34                     | 1568.8                               |
|                      |                       |                                                        |             | 721                | VVTKPGHIINPIKAEDVGYR | 740              | 1+                        | 25.03                     | 2205.17                              |
| <b>PARN IP2</b>      |                       |                                                        |             |                    |                      |                  |                           |                           |                                      |
| Q2NL82               | TSR1_HUMAN            | Pre-rRNA-processing protein TSR1 homolog               | TSR1        | 715                | YMFNFR               | 720              | 1+                        | 32.43                     | 876.37                               |
|                      |                       |                                                        |             | 715                | YMFNFR               | 720              | 1+                        | 10.47                     | 892.35                               |
|                      |                       |                                                        |             | 241                | QQHLAFR              | 247              | 1+                        | 19.8                      | 898.45                               |
|                      |                       |                                                        |             | 518                | ENLPQDYAR            | 526              | 1+                        | 57.8                      | 1104.49                              |
|                      |                       |                                                        |             | 527                | IFQFQNFNTR           | 537              | 1+                        | 90.3                      | 1414.69                              |
|                      |                       |                                                        |             | 610                | AKEELIFHCGFR         | 621              | 1+                        | 25.68                     | 1448.69                              |
|                      |                       |                                                        |             | 94                 | ISLPEAMQLLQDR        | 106              | 1+                        | 79.23                     | 1512.78                              |
|                      |                       |                                                        |             | 301                | QIDAPGDPFPLNPR       | 314              | 1+                        | 46.99                     | 1535.75                              |
|                      |                       |                                                        |             | 480                | LEEMFPDEVDTPR        | 492              | 1+                        | 78.22                     | 1576.67                              |
|                      |                       |                                                        |             | 79                 | DGPPHQVLVPLHSR       | 93               | 1+                        | 130.21                    | 1649.88                              |
|                      |                       |                                                        |             | 220                | LLLLDTQQEAGMLLR      | 234              | 1+                        | 20.84                     | 1712.92                              |
| 511                  | TSPWDPKENLPQDYAR      | 526                                                    | 1+          | 28.7               | 1915.88              |                  |                           |                           |                                      |
| <b>PARN IP3</b>      |                       |                                                        |             |                    |                      |                  |                           |                           |                                      |
| O95453               | PARN_HUMAN            | Poly(A)-specific ribonuclease PARN                     | PARN        | 129                | NGIPYLNQEEER         | 140              | 1+                        | 45.53                     | 1460.66                              |
|                      |                       |                                                        |             | 87                 | SFNFYVFPKPFNR        | 99               | 1+                        | 32.08                     | 1661.8                               |
|                      |                       |                                                        |             | 257                | HAKEQEELNDAVGFSR     | 272              | 1+                        | 14.18                     | 1828.83                              |
| Q9BV14               | NOC4L_HUMAN           | Nucleolar complex protein 4 homolog                    | NOC4L       | 17                 | RLEAVLASR            | 25               | 1+                        | 15.45                     | 1013.56                              |
|                      |                       |                                                        |             | 137                | SKWEGNYLFPR          | 147              | 1+                        | 17.71                     | 1395.66                              |
|                      |                       |                                                        |             | 430                | ALESSLWELQALQR       | 443              | 1+                        | 45.5                      | 1642.83                              |
| <b>PARN IP4</b>      |                       |                                                        |             |                    |                      |                  |                           |                           |                                      |
| Q13895               | BYST_HUMAN            | Bystin                                                 | BYSL        | 420                | ELQSAVPR             | 427              | 1+                        | 54.08                     | 898.44                               |

|                 |            |                                          |        |     |                      |     |    |        |         |
|-----------------|------------|------------------------------------------|--------|-----|----------------------|-----|----|--------|---------|
|                 |            |                                          |        | 399 | EALLELLR             | 406 | 1+ | 19.84  | 955.52  |
|                 |            |                                          |        | 249 | FYNLVLLPR            | 257 | 1+ | 64.36  | 1133.62 |
|                 |            |                                          |        | 41  | GTGEAEVEEYVGPR       | 53  | 1+ | 82.81  | 1392.57 |
|                 |            |                                          |        | 407 | LQPHPQLSPEIR         | 418 | 1+ | 82.81  | 1413.73 |
|                 |            |                                          |        | 16  | HAPLADQILAGNAVR      | 30  | 1+ | 125.64 | 1544.8  |
|                 |            |                                          |        | 407 | LQPHPQLSPEIRR        | 419 | 1+ | 41.19  | 1569.82 |
|                 |            |                                          |        | 39  | GRGTGEAEVEEYVGPR     | 53  | 1+ | 40.49  | 1605.68 |
|                 |            |                                          |        | 391 | ADLATDQKEALLELLR     | 406 | 1+ | 30.23  | 1797.93 |
|                 |            |                                          |        | 389 | YKADLATDQKEALLELLR   | 406 | 1+ | 38.12  | 2089.08 |
|                 |            |                                          |        | 64  | QQQEELEAEHGTGDKPAAPR | 83  | 1+ | 70.4   | 2189.97 |
| <b>PARN IP6</b> |            |                                          |        |     |                      |     |    |        |         |
| P61247          | RS3A_HUMAN | 40S ribosomal protein S3a                | RPS3A  | 35  | APAMFNIR             | 42  | 1+ | 32.67  | 918.44  |
|                 |            |                                          |        | 153 | TSYAQHQQVR           | 162 | 1+ | 30.15  | 1216.57 |
|                 |            |                                          |        | 66  | VFEVSLADLQNDEVAFR    | 82  | 1+ | 20.9   | 1950.93 |
|                 |            |                                          |        | 66  | VFEVSLADLQNDEVAFRK   | 83  | 1+ | 38.86  | 2079.02 |
| <b>PARN IP8</b> |            |                                          |        |     |                      |     |    |        |         |
| Q9Y3B7          | RM11_HUMAN | 39S ribosomal protein L11, mitochondrial | MRPL11 | 26  | AGLAMPGPPLGPVLGQR    | 42  | 1+ | 69.45  | 1645.89 |
|                 |            |                                          |        | 123 | IKAQDEAFALQDVPLSSVVR | 142 | 1+ | 18.7   | 2185.19 |

a. The positions are indicated for the amino- (Start) and carboxyl- (End) termini of the identified peptides. b. The significance threshold ( $P = 0.05$ ) and probability-based MOWSE scores are shown, which were obtained from a database search by MASCOT (23-25). Scores that exceed their threshold are statistically confident with >95% certainty. c. The charge state and observed precursor mass are indicated.



# Supplementary Fig. S1

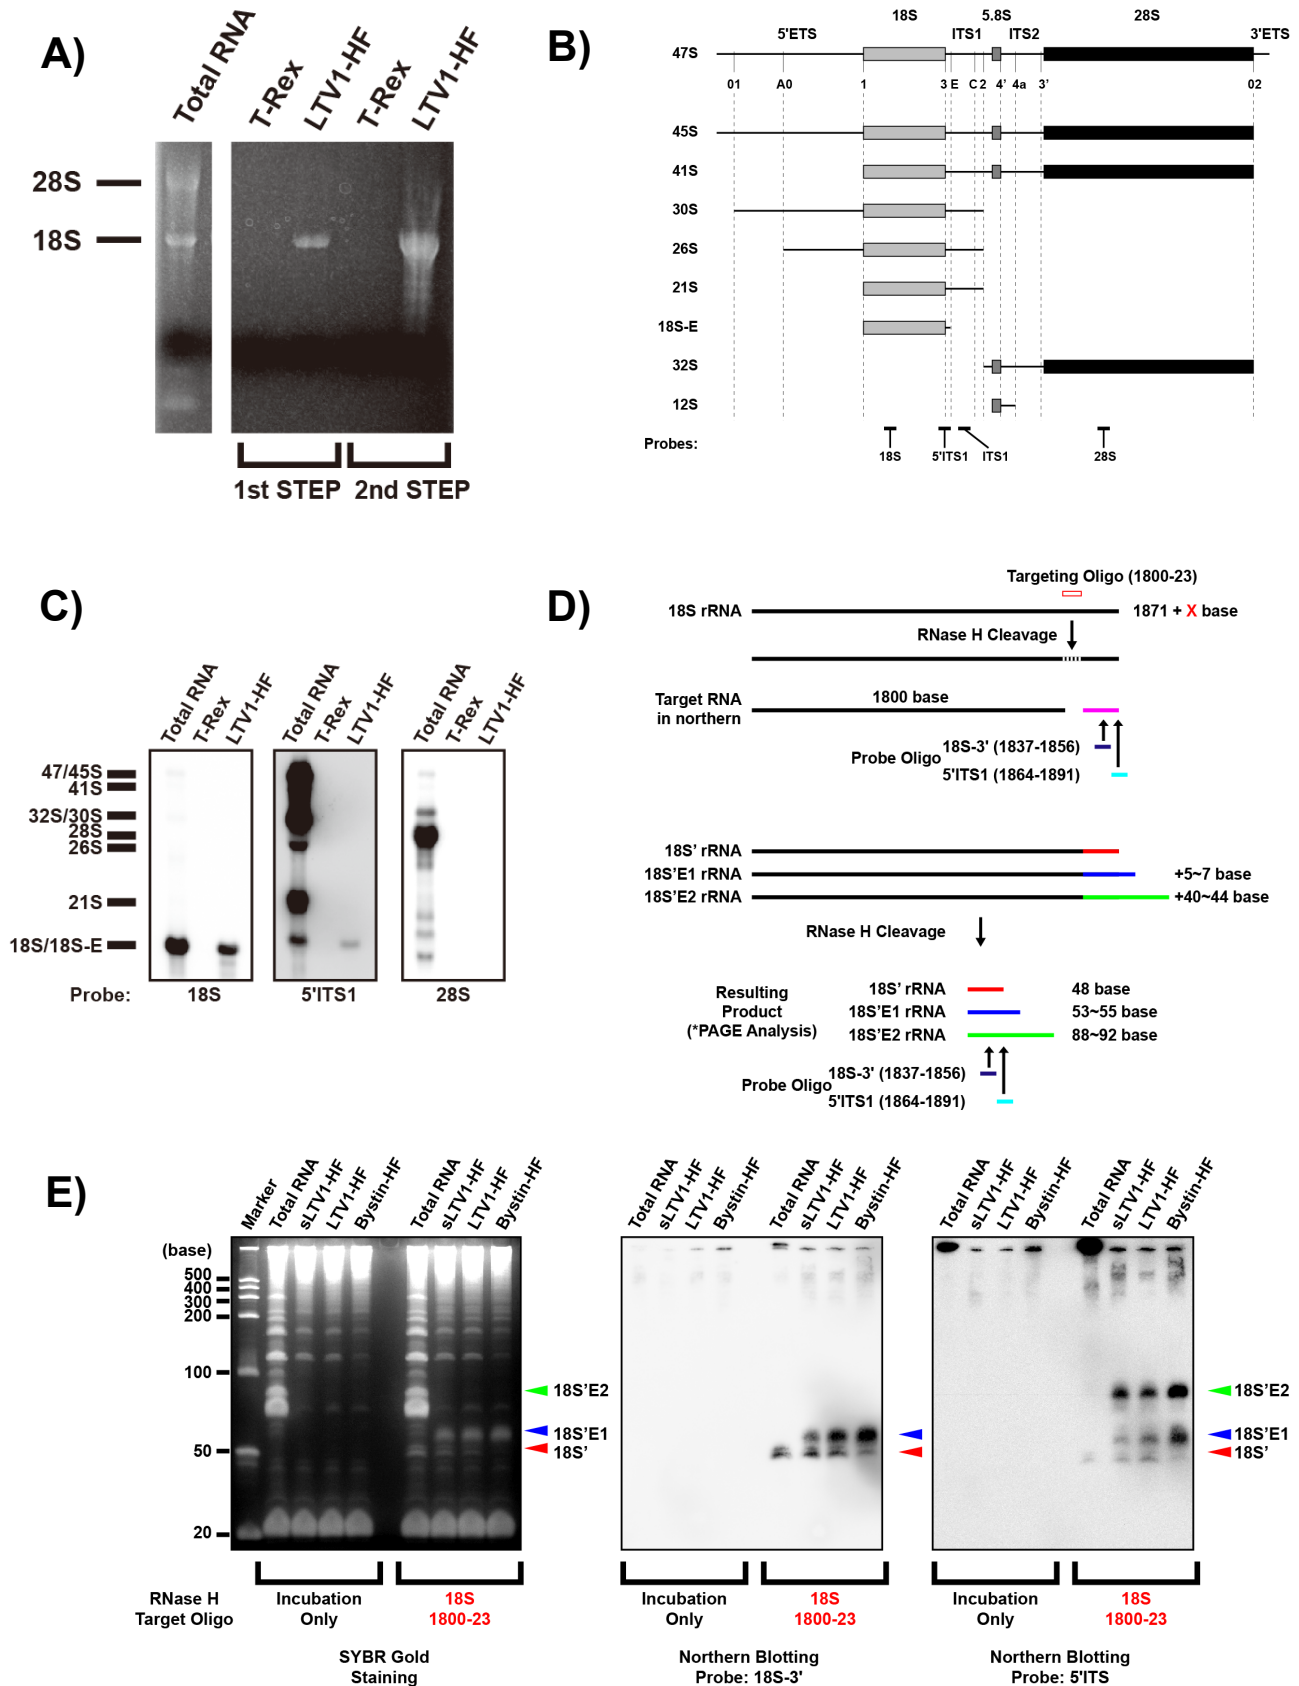

# Supplementary Fig. S2

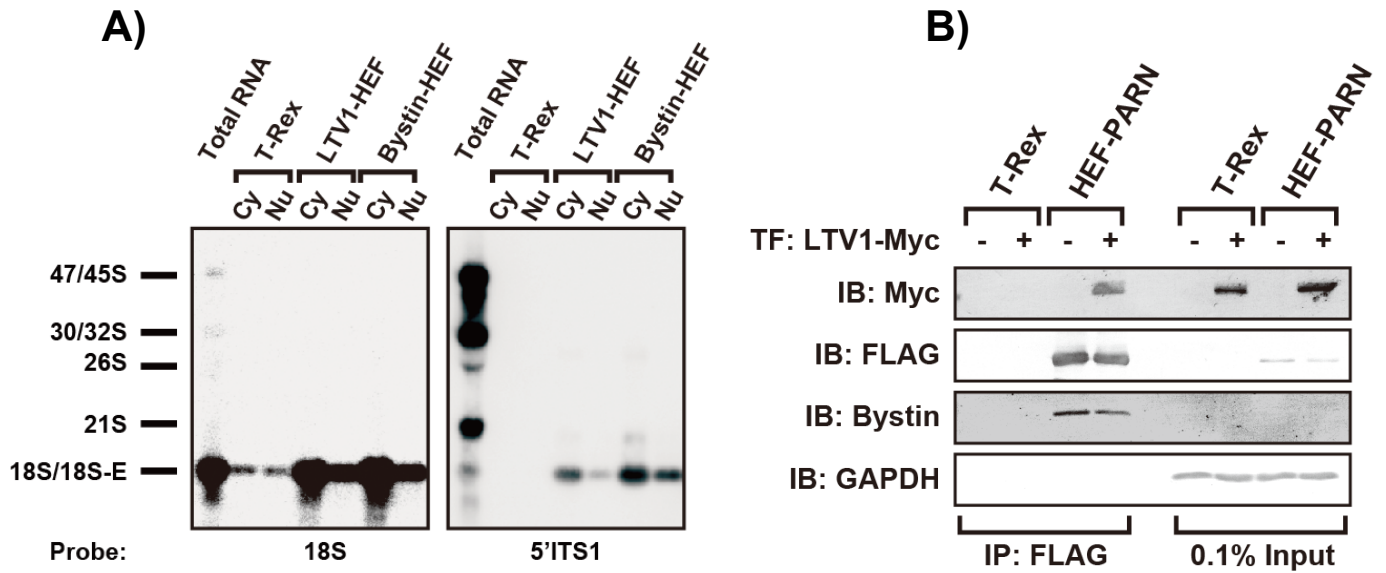

**C)**

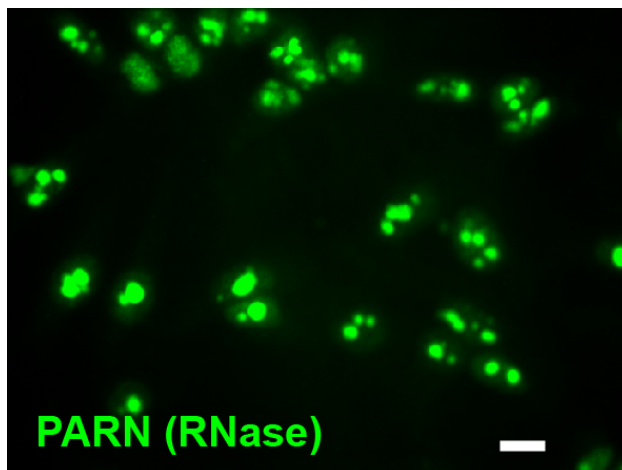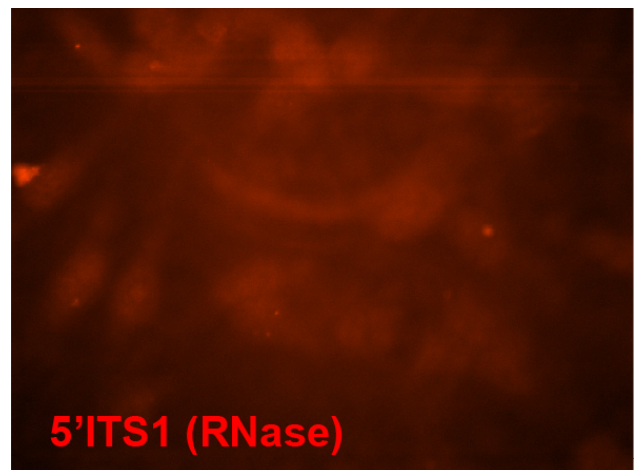

# Supplementary Fig. S3

A)

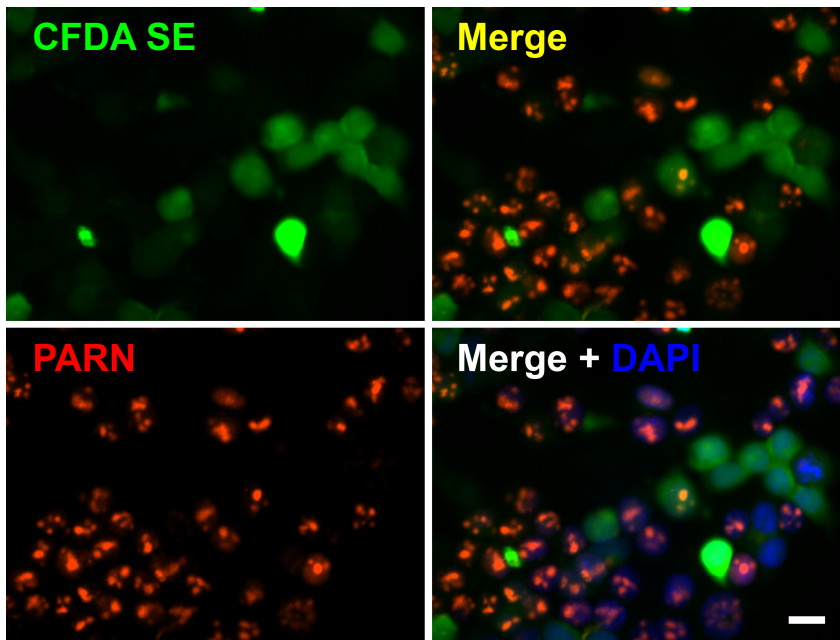

B)

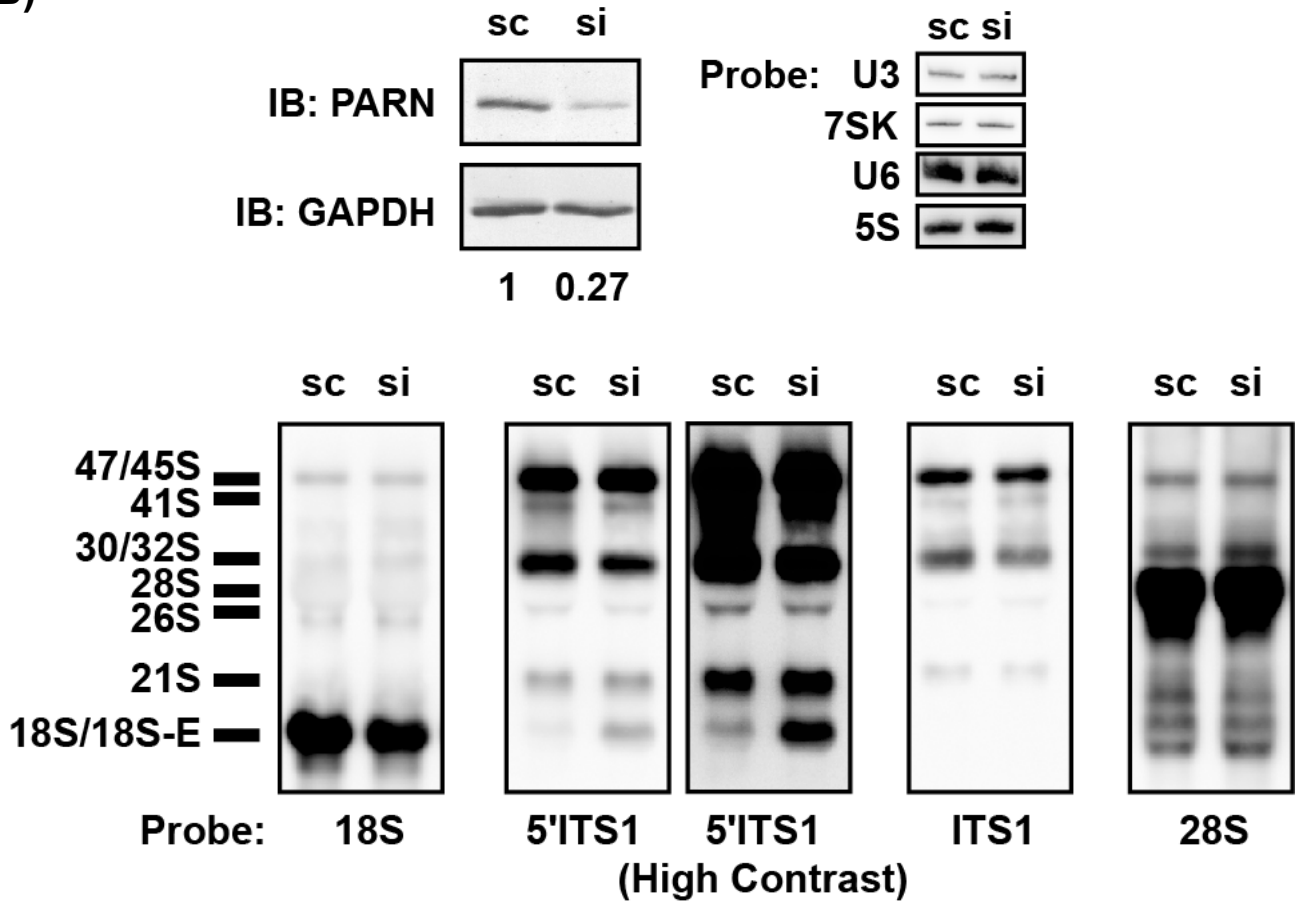

293EBNA Cells

# Supplementary Fig. S4

A)

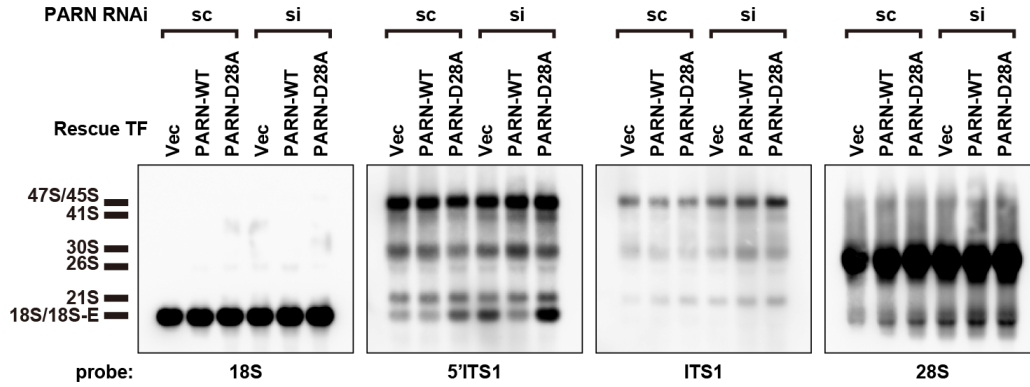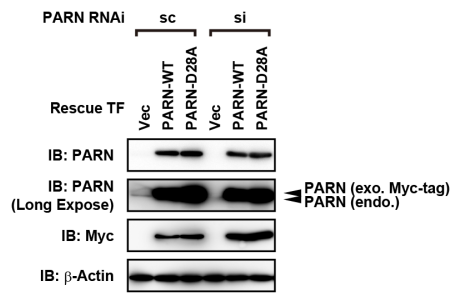

B)

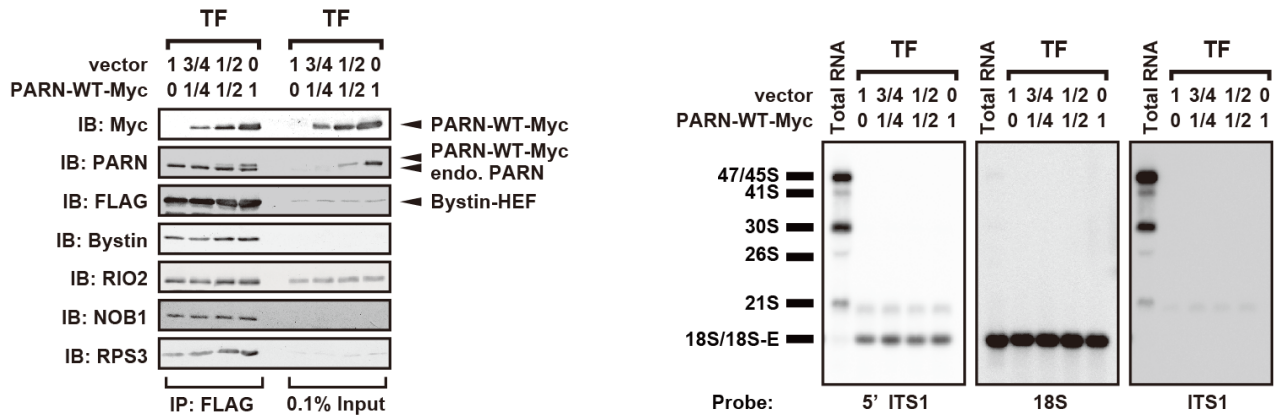

C)

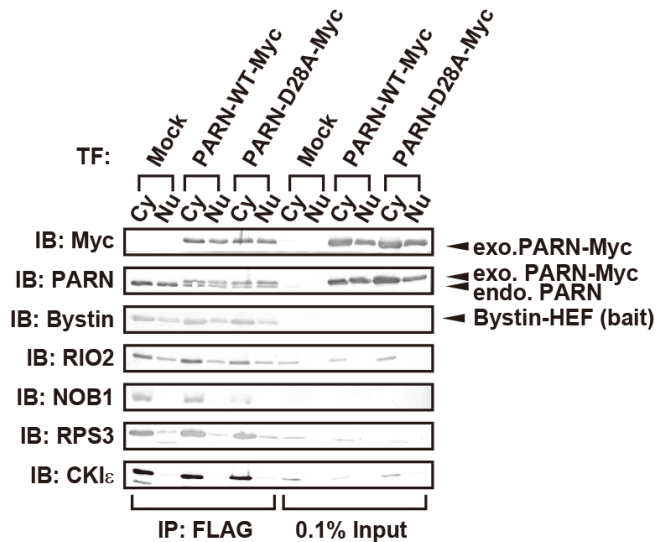

Supplement: gkw1047_Supp.pdf [file gkw1047_Supp.pdf]
